# Supplementary material
Source: publisher figshare collection journal article supplement (https://acs.figshare.com/ndownloader/files/5116531)
Supplement: Supplementary file 1 [file 5116531]

 
data_1 
 
_audit_creation_method            SHELXL-97 
_chemical_name_systematic 
; 
 ? 
; 
_chemical_name_common             ? 
_chemical_melting_point           ? 
_chemical_formula_moiety          ? 
_chemical_formula_sum 
 'C70 H64 Cl4 Mn Mo6 N2 O24 S48' 
_chemical_formula_weight          3628.49 
 
loop_ 
 _atom_type_symbol 
 _atom_type_description 
 _atom_type_scat_dispersion_real 
 _atom_type_scat_dispersion_imag 
 _atom_type_scat_source 
 'C'  'C'   0.0033   0.0016 
 'International Tables Vol C Tables 4.2.6.8 and 6.1.1.4' 
 'H'  'H'   0.0000   0.0000 
 'International Tables Vol C Tables 4.2.6.8 and 6.1.1.4' 
 'N'  'N'   0.0061   0.0033 
 'International Tables Vol C Tables 4.2.6.8 and 6.1.1.4' 
 'O'  'O'   0.0106   0.0060 
 'International Tables Vol C Tables 4.2.6.8 and 6.1.1.4' 
 'S'  'S'   0.1246   0.1234 
 'International Tables Vol C Tables 4.2.6.8 and 6.1.1.4' 
 'Mn'  'Mn'   0.3368   0.7283 
 'International Tables Vol C Tables 4.2.6.8 and 6.1.1.4' 
 'Mo'  'Mo'  -1.6832   0.6857 
 'International Tables Vol C Tables 4.2.6.8 and 6.1.1.4' 
 'Cl'  'Cl'   0.1484   0.1585 
 'International Tables Vol C Tables 4.2.6.8 and 6.1.1.4' 
 
_symmetry_cell_setting            'Triclinic' 
_symmetry_space_group_name_H-M    'P-1' 
 
loop_ 
 _symmetry_equiv_pos_as_xyz 
 'x, y, z' 
 '-x, -y, -z' 
 
_cell_length_a                    9.0712(18) 
_cell_length_b                    15.977(3) 
_cell_length_c                    21.698(4) 
_cell_angle_alpha                 70.01(3) 
_cell_angle_beta                  84.35(3) 
_cell_angle_gamma                 88.29(3) 
_cell_volume                      2940.8(10) 
_cell_formula_units_Z             1 
_cell_measurement_temperature     150(2) 
_cell_measurement_reflns_used     ? 
_cell_measurement_theta_min       ?
_cell_measurement_theta_max       ? 
 
_exptl_crystal_description        'Block' 
_exptl_crystal_colour             'Dark brown' 
_exptl_crystal_size_max           0.25 
_exptl_crystal_size_mid           0.23 
_exptl_crystal_size_min           0.13 
_exptl_crystal_density_meas       ? 
_exptl_crystal_density_diffrn     2.049 
_exptl_crystal_density_method     'not measured' 
_exptl_crystal_F_000              1803 
_exptl_absorpt_coefficient_mu     1.732 
_exptl_absorpt_correction_type    'PSI scan' 
_exptl_absorpt_correction_T_min   0.8123  
_exptl_absorpt_correction_T_max   1.2750 
_exptl_absorpt_process_details    ? 
 
_exptl_special_details 
; 
 ? 
; 
 
_diffrn_ambient_temperature       150(2) 
_diffrn_radiation_wavelength      0.71073 
_diffrn_radiation_type            MoK\a 
_diffrn_radiation_source          'fine-focus sealed tube' 
_diffrn_radiation_monochromator   graphite 
_diffrn_measurement_device_type   'Rigaku R-AXIS RAPID IP'  
_diffrn_measurement_method        'Oscillation' 
_diffrn_detector_area_resol_mean  ? 
_diffrn_standards_number          ? 
_diffrn_standards_interval_count  ? 
_diffrn_standards_interval_time   ? 
_diffrn_standards_decay_%         ? 
_diffrn_reflns_number             19525 
_diffrn_reflns_av_R_equivalents   0.1061 
_diffrn_reflns_av_sigmaI/netI     0.2980 
_diffrn_reflns_limit_h_min        -11 
_diffrn_reflns_limit_h_max        11 
_diffrn_reflns_limit_k_min        -20 
_diffrn_reflns_limit_k_max        20 
_diffrn_reflns_limit_l_min        -28 
_diffrn_reflns_limit_l_max        28 
_diffrn_reflns_theta_min          1.00 
_diffrn_reflns_theta_max          27.48 
_reflns_number_total              12794 
_reflns_number_gt                 5725 
_reflns_threshold_expression      >2sigma(I) 
 
_computing_data_collection        'RAPID AUTO (Rigaku, 2001)'  
_computing_cell_refinement        'RAPID AUTO (Rigaku, 2001)'  
_computing_data_reduction         'RAPID AUTO (Rigaku, 2001)'  
_computing_structure_solution     'SHELXS-97 (Sheldrick, 1990)' 
_computing_structure_refinement   'SHELXL-97 (Sheldrick, 1997)' 
_computing_molecular_graphics     'SHELXL (Siemens, 1994)' 
_computing_publication_material   'SHELXL (Siemens, 1994)' 
 
_refine_special_details 
; 
 Refinement of F^2^ against ALL reflections.  The weighted R-factor wR and 
 goodness of fit S are based on F^2^, conventional R-factors R are based 
 on F, with F set to zero for negative F^2^. The threshold expression of 
 F^2^ > 2sigma(F^2^) is used only for calculating R-factors(gt) etc. and is 
 not relevant to the choice of reflections for refinement.  R-factors based 
 on F^2^ are statistically about twice as large as those based on F, and R- 
 factors based on ALL data will be even larger. 
; 
 
_refine_ls_structure_factor_coef  Fsqd  
_refine_ls_matrix_type            full 
_refine_ls_weighting_scheme       calc  
_refine_ls_weighting_details 
 'calc w=1/[\s^2^(Fo^2^)+(0.0646P)^2^+0.0000P] where P=(Fo^2^+2Fc^2^)/3' 
_atom_sites_solution_primary      direct 
_atom_sites_solution_secondary    difmap 
_atom_sites_solution_hydrogens    geom 
_refine_ls_hydrogen_treatment     mixed 
_refine_ls_extinction_method      none 
_refine_ls_extinction_coef        ? 
_refine_ls_number_reflns          12794 
_refine_ls_number_parameters      700 
_refine_ls_number_restraints      96 
_refine_ls_R_factor_all           0.2251 
_refine_ls_R_factor_gt            0.0977 
_refine_ls_wR_factor_ref          0.2056 
_refine_ls_wR_factor_gt           0.1562 
_refine_ls_goodness_of_fit_ref    0.975 
_refine_ls_restrained_S_all       0.973 
_refine_ls_shift/su_max           0.000 
_refine_ls_shift/su_mean          0.000 
 
loop_ 
 _atom_site_label 
 _atom_site_type_symbol 
 _atom_site_fract_x 
 _atom_site_fract_y 
 _atom_site_fract_z 
 _atom_site_U_iso_or_equiv 
 _atom_site_adp_type 
 _atom_site_occupancy 
 _atom_site_symmetry_multiplicity 
 _atom_site_calc_flag 
 _atom_site_refinement_flags 
 _atom_site_disorder_assembly 
 _atom_site_disorder_group 
Mn1 Mn 1.0000 0.5000 0.0000 0.0154(7) Uani 1 2 d S . . 
Mo1 Mo 1.01772(14) 0.31664(8) 0.13339(6) 0.0159(3) Uani 1 1 d . . . 
Mo2 Mo 1.15192(13) 0.50819(8) 0.13379(5) 0.0137(3) Uani 1 1 d . . . 
Mo3 Mo 1.13659(13) 0.69231(8) -0.00086(6) 0.0154(3) Uani 1 1 d . . . 
S1 S -0.2747(4) 0.1202(2) 0.83874(17) 0.0250(9) Uani 1 1 d . . . 
S2 S -0.4400(4) 0.3308(2) 0.79792(17) 0.0231(9) Uani 1 1 d . . . 
S3 S -0.1457(4) 0.1819(2) 0.70255(17) 0.0200(8) Uani 1 1 d . . . 
S4 S -0.2854(4) 0.3585(2) 0.66538(17) 0.0208(9) Uani 1 1 d . . . 
S5 S 0.0167(4) 0.2331(2) 0.55295(17) 0.0216(9) Uani 1 1 d . . . 
S6 S -0.1321(4) 0.4076(2) 0.51755(17) 0.0233(9) Uani 1 1 d . . . 
S7 S 0.1578(5) 0.2582(2) 0.41945(18) 0.0267(9) Uani 1 1 d . . . 
S8 S -0.0228(5) 0.4661(2) 0.37685(18) 0.0260(9) Uani 1 1 d . . . 
S9 S 0.1225(4) 0.3505(2) 0.73763(17) 0.0255(9) Uani 1 1 d . . . 
S10 S 0.3096(4) 0.1444(2) 0.78443(16) 0.0213(9) Uani 1 1 d . . . 
S11 S 0.2834(4) 0.3765(2) 0.60722(17) 0.0210(9) Uani 1 1 d . . . 
S12 S 0.4425(4) 0.2073(2) 0.64606(16) 0.0173(8) Uani 1 1 d . . . 
S13 S 0.4355(4) 0.4269(2) 0.45952(16) 0.0171(8) Uani 1 1 d . . . 
S14 S 0.5886(4) 0.2554(2) 0.49355(16) 0.0200(8) Uani 1 1 d . . . 
S15 S 0.5465(4) 0.4896(2) 0.31951(17) 0.0217(9) Uani 1 1 d . . . 
S16 S 0.7266(4) 0.2821(2) 0.35930(16) 0.0200(8) Uani 1 1 d . . . 
S17 S 1.5875(4) 1.0081(2) -0.25165(17) 0.0216(9) Uani 1 1 d . . . 
S18 S 1.4254(4) 0.8144(2) -0.26146(17) 0.0248(9) Uani 1 1 d . . . 
S19 S 1.6936(4) 1.0400(2) -0.38966(17) 0.0193(8) Uani 1 1 d . . . 
S20 S 1.5574(4) 0.8814(2) -0.39931(16) 0.0173(8) Uani 1 1 d . . . 
S21 S 1.8600(4) 1.0822(2) -0.53719(16) 0.0177(8) Uani 1 1 d . . . 
S22 S 1.7051(4) 0.9294(2) -0.54856(17) 0.0206(9) Uani 1 1 d . . . 
S23 S 2.0122(4) 1.1377(2) -0.67307(17) 0.0216(9) Uani 1 1 d . . . 
S24 S 1.8142(4) 0.9578(2) -0.68546(17) 0.0204(8) Uani 1 1 d . . . 
C1 C -0.383(2) 0.1692(10) 0.8935(7) 0.046(5) Uani 1 1 d . . . 
H1A H -0.4865 0.1555 0.8949 0.055 Uiso 1 1 calc R . . 
H1B H -0.3525 0.1423 0.9377 0.055 Uiso 1 1 calc R . . 
C2 C -0.3639(16) 0.2684(8) 0.8724(6) 0.024(3) Uani 1 1 d U . . 
H2A H -0.2589 0.2818 0.8674 0.029 Uiso 1 1 calc R . . 
H2B H -0.4095 0.2882 0.9073 0.029 Uiso 1 1 calc R . . 
C3 C -0.3314(16) 0.2849(8) 0.7461(6) 0.023(4) Uani 1 1 d . . . 
C4 C -0.2674(15) 0.2054(9) 0.7626(6) 0.020(3) Uani 1 1 d . . . 
C5 C -0.1726(16) 0.2817(9) 0.6413(7) 0.022(3) Uani 1 1 d . . . 
C6 C -0.1081(14) 0.3042(8) 0.5779(6) 0.017(3) Uani 1 1 d . . . 
C7 C 0.0384(14) 0.3032(8) 0.4698(6) 0.016(3) Uani 1 1 d U . . 
C8 C -0.0260(15) 0.3831(8) 0.4545(6) 0.018(3) Uani 1 1 d . . . 
C9 C 0.1407(15) 0.4347(8) 0.3361(6) 0.019(3) Uani 1 1 d . . . 
H9A H 0.1503 0.4730 0.2903 0.023 Uiso 1 1 calc R . . 
H9B H 0.2266 0.4448 0.3560 0.023 Uiso 1 1 calc R . . 
C10 C 0.1405(15) 0.3390(8) 0.3392(6) 0.016(3) Uani 1 1 d . . . 
H10A H 0.2216 0.3308 0.3092 0.020 Uiso 1 1 calc R . . 
H10B H 0.0491 0.3274 0.3238 0.020 Uiso 1 1 calc R . . 
C11 C 0.141(2) 0.2721(10) 0.8147(8) 0.045(5) Uani 1 1 d U . . 
H11A H 0.2274 0.2897 0.8307 0.054 Uiso 1 1 calc R . . 
H11B H 0.0561 0.2787 0.8433 0.054 Uiso 1 1 calc R . . 
C12 C 0.156(2) 0.1825(10) 0.8251(8) 0.058(6) Uani 1 1 d . . . 
H12A H 0.0664 0.1629 0.8127 0.070 Uiso 1 1 calc R . . 
H12B H 0.1583 0.1522 0.8720 0.070 Uiso 1 1 calc R . . 
C13 C 0.3247(14) 0.2283(8) 0.7071(6) 0.015(3) Uani 1 1 d U . . 
C14 C 0.2526(15) 0.3074(8) 0.6890(6) 0.016(3) Uani 1 1 d . . . 
C15 C 0.4058(14) 0.3044(8) 0.5846(6) 0.016(3) Uani 1 1 d . . . 
C16 C 0.4713(14) 0.3273(8) 0.5205(6) 0.015(3) Uani 1 1 d U . . 
C17 C 0.6171(14) 0.3260(8) 0.4115(6) 0.014(3) Uani 1 1 d U . . 
C18 C 0.5432(15) 0.4055(9) 0.3962(6) 0.019(3) Uani 1 1 d . . . 
C19 C 0.5980(14) 0.4250(9) 0.2669(6) 0.020(3) Uani 1 1 d . . . 
H19A H 0.5199 0.3824 0.2717 0.024 Uiso 1 1 calc R . . 
H19B H 0.6080 0.4644 0.2213 0.024 Uiso 1 1 calc R . . 
C20 C 0.7421(16) 0.3755(9) 0.2828(6) 0.024(3) Uani 1 1 d U . . 
H20A H 0.8159 0.4167 0.2853 0.028 Uiso 1 1 calc R . . 
H20B H 0.7769 0.3541 0.2472 0.028 Uiso 1 1 calc R . . 
C21 C 1.4657(17) 0.9286(8) -0.1914(7) 0.028(4) Uani 1 1 d . . . 
H21A H 1.4806 0.9303 -0.1481 0.034 Uiso 1 1 calc R . . 
H21B H 1.3642 0.9460 -0.1997 0.034 Uiso 1 1 calc R . . 
C22 C 1.4881(15) 0.8329(8) -0.1908(6) 0.017(3) Uani 1 1 d U . . 
H22A H 1.4353 0.7927 -0.1512 0.020 Uiso 1 1 calc R . . 
H22B H 1.5926 0.8186 -0.1890 0.020 Uiso 1 1 calc R . . 
C23 C 1.5313(15) 0.8986(8) -0.3225(6) 0.020(3) Uani 1 1 d U . . 
C24 C 1.5934(15) 0.9713(8) -0.3188(6) 0.017(3) Uani 1 1 d U . . 
C25 C 1.6703(16) 0.9746(8) -0.4378(6) 0.019(3) Uani 1 1 d . . . 
C26 C 1.7380(14) 0.9941(8) -0.5012(6) 0.017(3) Uani 1 1 d U . . 
C27 C 1.8137(15) 0.9956(8) -0.6182(6) 0.019(3) Uani 1 1 d . . . 
C28 C 1.8911(15) 1.0653(9) -0.6134(6) 0.019(3) Uani 1 1 d . . . 
C29 C 2.0519(14) 1.0761(8) -0.7273(6) 0.019(3) Uani 1 1 d . . . 
H29A H 2.1132 1.1126 -0.7658 0.023 Uiso 1 1 calc R . . 
H29B H 2.1090 1.0240 -0.7053 0.023 Uiso 1 1 calc R . . 
C30 C 1.9182(16) 1.0465(9) -0.7496(6) 0.029(4) Uani 1 1 d . . . 
H30A H 1.9492 1.0261 -0.7861 0.034 Uiso 1 1 calc R . . 
H30B H 1.8535 1.0972 -0.7656 0.034 Uiso 1 1 calc R . . 
C31 C 0.7013(15) 0.5855(9) -0.0243(6) 0.021(3) Uani 1 1 d . . . 
H31A H 0.6195 0.5599 -0.0376 0.025 Uiso 1 1 calc R . . 
H31B H 0.6848 0.6492 -0.0369 0.025 Uiso 1 1 calc R . . 
C32 C 0.8207(14) 0.5892(9) 0.0766(6) 0.021(3) Uani 1 1 d . . . 
H32A H 0.8047 0.6531 0.0615 0.025 Uiso 1 1 calc R . . 
H32B H 0.8078 0.5681 0.1244 0.025 Uiso 1 1 calc R . . 
C33 C 0.7168(14) 0.4439(8) 0.0777(6) 0.014(3) Uani 1 1 d U . . 
H33A H 0.7064 0.4234 0.1255 0.017 Uiso 1 1 calc R . . 
H33B H 0.6363 0.4179 0.0640 0.017 Uiso 1 1 calc R . . 
C34 C 0.6999(13) 0.5458(8) 0.0519(6) 0.008(3) Uani 1 1 d U . . 
C35 C 1.196(3) 0.1128(13) 0.0481(15) 0.129(12) Uani 1 1 d . . . 
H35A H 1.1728 0.0801 0.0946 0.155 Uiso 1 1 calc R . . 
H35B H 1.1181 0.1554 0.0326 0.155 Uiso 1 1 calc R . . 
N1 N 0.5584(11) 0.5696(7) 0.0802(5) 0.017(3) Uani 1 1 d . . . 
O1 O 0.8383(9) 0.5703(5) -0.0604(4) 0.013(2) Uani 1 1 d U . . 
O2 O 0.9748(9) 0.5728(5) 0.0560(4) 0.013(2) Uani 1 1 d . . . 
O3 O 0.8542(9) 0.4109(5) 0.0564(4) 0.012(2) Uani 1 1 d . . . 
O4 O 1.0207(9) 0.2792(5) 0.0570(4) 0.014(2) Uani 1 1 d U . . 
O5 O 1.1663(10) 0.2591(6) 0.1697(4) 0.025(2) Uani 1 1 d . . . 
O6 O 1.3049(10) 0.4559(6) 0.1697(4) 0.020(2) Uani 1 1 d . . . 
O7 O 1.2811(10) 0.7521(6) -0.0511(4) 0.026(2) Uani 1 1 d . . . 
O8 O 1.0741(10) 0.7526(6) 0.0489(4) 0.022(2) Uani 1 1 d . . . 
O9 O 0.8647(10) 0.2603(5) 0.1791(4) 0.020(2) Uani 1 1 d . . . 
O10 O 1.0841(9) 0.5721(6) 0.1796(4) 0.020(2) Uani 1 1 d . . . 
O11 O 1.2469(9) 0.5979(5) 0.0581(4) 0.0100(19) Uani 1 1 d U . . 
O12 O 1.0040(10) 0.4164(5) 0.1639(4) 0.016(2) Uani 1 1 d . . . 
Cl1 Cl 1.2203(11) 0.0401(4) 0.0025(4) 0.151(4) Uani 1 1 d . . . 
Cl2 Cl 1.3791(8) 0.1689(4) 0.0326(3) 0.092(2) Uani 1 1 d . . . 
 
loop_ 
 _atom_site_aniso_label 
 _atom_site_aniso_U_11 
 _atom_site_aniso_U_22 
 _atom_site_aniso_U_33 
 _atom_site_aniso_U_23 
 _atom_site_aniso_U_13 
 _atom_site_aniso_U_12 
Mn1 0.0141(18) 0.0165(16) 0.0140(16) -0.0042(13) 0.0031(14) 0.0003(14) 
Mo1 0.0194(8) 0.0173(7) 0.0093(6) -0.0029(5) -0.0008(6) 0.0032(6) 
Mo2 0.0117(7) 0.0223(7) 0.0085(6) -0.0075(5) 0.0000(5) 0.0023(6) 
Mo3 0.0157(7) 0.0194(7) 0.0116(7) -0.0071(5) 0.0017(6) 0.0014(6) 
S1 0.037(3) 0.021(2) 0.0151(19) -0.0051(16) 0.0020(18) 0.0065(18) 
S2 0.032(2) 0.027(2) 0.0111(18) -0.0086(16) -0.0004(17) 0.0087(18) 
S3 0.025(2) 0.0197(19) 0.0147(19) -0.0074(16) 0.0055(16) 0.0061(17) 
S4 0.028(2) 0.0165(19) 0.0160(19) -0.0055(16) 0.0065(17) 0.0029(17) 
S5 0.031(2) 0.0190(19) 0.0115(18) -0.0037(15) 0.0060(17) 0.0077(17) 
S6 0.034(2) 0.0155(19) 0.019(2) -0.0065(16) 0.0038(18) 0.0068(17) 
S7 0.036(3) 0.024(2) 0.018(2) -0.0082(17) 0.0052(18) 0.0163(19) 
S8 0.036(3) 0.022(2) 0.018(2) -0.0059(17) 0.0005(18) 0.0123(18) 
S9 0.040(3) 0.021(2) 0.0112(18) -0.0032(16) 0.0093(18) 0.0125(18) 
S10 0.031(2) 0.0213(19) 0.0102(18) -0.0055(15) 0.0051(17) 0.0031(17) 
S11 0.029(2) 0.0192(19) 0.0123(18) -0.0042(15) 0.0044(17) 0.0067(17) 
S12 0.021(2) 0.0165(18) 0.0111(17) -0.0028(14) 0.0056(15) 0.0040(16) 
S13 0.020(2) 0.0186(18) 0.0112(18) -0.0050(15) 0.0018(15) 0.0080(16) 
S14 0.029(2) 0.0200(19) 0.0095(18) -0.0049(15) 0.0027(16) 0.0064(17) 
S15 0.031(2) 0.0199(19) 0.0116(18) -0.0042(15) 0.0045(17) 0.0078(17) 
S16 0.028(2) 0.0185(19) 0.0111(18) -0.0045(15) 0.0061(17) 0.0024(17) 
S17 0.028(2) 0.024(2) 0.0155(19) -0.0128(16) 0.0054(17) -0.0067(17) 
S18 0.032(2) 0.026(2) 0.017(2) -0.0086(17) 0.0038(18) -0.0062(18) 
S19 0.026(2) 0.0170(19) 0.0137(18) -0.0051(15) 0.0022(16) -0.0037(16) 
S20 0.021(2) 0.0189(19) 0.0108(18) -0.0054(15) 0.0062(16) -0.0045(16) 
S21 0.025(2) 0.0177(19) 0.0097(17) -0.0048(15) 0.0030(16) 0.0025(16) 
S22 0.030(2) 0.0169(19) 0.0139(19) -0.0049(15) 0.0050(17) -0.0055(17) 
S23 0.029(2) 0.0193(19) 0.0145(19) -0.0053(16) 0.0057(17) -0.0046(17) 
S24 0.024(2) 0.0226(19) 0.0155(19) -0.0084(16) 0.0020(17) -0.0066(17) 
C1 0.077(14) 0.050(11) 0.014(8) -0.020(8) 0.000(9) 0.032(10) 
C2 0.031(6) 0.023(5) 0.025(5) -0.016(4) -0.005(5) 0.004(5) 
C3 0.038(10) 0.010(7) 0.017(8) -0.002(6) 0.003(7) -0.006(7) 
C4 0.022(9) 0.022(8) 0.015(8) -0.003(6) -0.005(7) 0.005(7) 
C5 0.027(9) 0.023(8) 0.018(8) -0.010(6) 0.009(7) -0.002(7) 
C6 0.013(8) 0.029(8) 0.016(7) -0.016(7) 0.000(6) 0.001(7) 
C7 0.012(5) 0.019(5) 0.013(5) -0.004(4) 0.008(4) -0.004(4) 
C8 0.021(9) 0.019(7) 0.013(7) -0.009(6) 0.007(6) 0.009(7) 
C9 0.027(9) 0.019(8) 0.011(7) -0.005(6) 0.003(7) -0.009(7) 
C10 0.021(8) 0.027(8) 0.003(6) -0.007(6) 0.001(6) -0.007(7) 
C11 0.051(7) 0.040(6) 0.041(6) -0.015(5) 0.010(5) 0.009(5) 
C12 0.090(17) 0.035(11) 0.029(11) 0.005(8) 0.023(11) 0.020(11) 
C13 0.017(5) 0.018(5) 0.009(5) -0.004(4) 0.002(4) -0.003(4) 
C14 0.022(9) 0.014(7) 0.012(7) -0.006(6) 0.009(6) -0.003(6) 
C15 0.004(7) 0.023(8) 0.018(8) -0.003(6) 0.005(6) -0.002(6) 
C16 0.011(5) 0.019(5) 0.014(5) -0.003(4) -0.009(4) 0.002(4) 
C17 0.014(5) 0.014(5) 0.018(5) -0.008(4) -0.004(4) -0.003(4) 
C18 0.015(8) 0.025(8) 0.018(8) -0.009(6) 0.007(6) -0.008(7) 
C19 0.010(8) 0.047(9) 0.004(7) -0.011(6) -0.001(6) 0.011(7) 
C20 0.031(6) 0.027(5) 0.016(5) -0.011(4) -0.004(5) 0.002(5) 
C21 0.044(11) 0.025(8) 0.016(8) -0.008(7) -0.006(8) 0.008(8) 
C22 0.022(5) 0.021(5) 0.011(5) -0.011(4) 0.000(4) 0.004(4) 
C23 0.023(6) 0.019(5) 0.013(5) -0.002(4) 0.004(4) 0.005(4) 
C24 0.019(5) 0.020(5) 0.014(5) -0.010(4) 0.006(4) -0.003(4) 
C25 0.030(9) 0.015(7) 0.012(7) -0.006(6) -0.001(7) -0.010(7) 
C26 0.015(5) 0.016(5) 0.020(5) -0.007(4) -0.001(4) 0.006(4) 
C27 0.023(9) 0.018(7) 0.009(7) 0.002(6) 0.001(6) 0.013(7) 
C28 0.015(8) 0.031(8) 0.008(7) -0.004(6) 0.003(6) 0.004(7) 
C29 0.017(8) 0.022(8) 0.018(8) -0.010(6) 0.015(6) -0.002(7) 
C30 0.045(11) 0.025(8) 0.015(8) -0.008(7) 0.005(8) -0.006(8) 
C31 0.025(9) 0.025(8) 0.019(8) -0.016(7) -0.002(7) 0.005(7) 
C32 0.021(9) 0.020(8) 0.013(7) 0.003(6) 0.005(6) 0.007(7) 
C33 0.011(5) 0.019(5) 0.013(5) -0.007(4) 0.004(4) 0.000(4) 
C34 0.007(5) 0.015(5) 0.005(5) -0.005(4) -0.001(4) 0.000(4) 
C35 0.10(2) 0.046(14) 0.25(4) -0.061(19) -0.02(2) 0.028(15) 
N1 0.008(6) 0.026(6) 0.028(7) -0.023(6) -0.002(5) 0.006(5) 
O1 0.012(4) 0.016(4) 0.010(4) -0.005(3) 0.005(3) 0.001(3) 
O2 0.010(5) 0.014(5) 0.016(5) -0.009(4) 0.004(4) 0.004(4) 
O3 0.012(5) 0.016(5) 0.012(5) -0.011(4) 0.003(4) -0.002(4) 
O4 0.015(4) 0.012(4) 0.015(4) -0.009(3) 0.000(3) 0.008(3) 
O5 0.023(6) 0.030(6) 0.016(5) -0.002(4) 0.000(5) -0.001(5) 
O6 0.021(6) 0.026(5) 0.013(5) -0.007(4) -0.003(4) 0.007(5) 
O7 0.026(6) 0.030(6) 0.022(6) -0.010(5) -0.003(5) -0.003(5) 
O8 0.016(6) 0.035(6) 0.015(5) -0.010(5) 0.003(4) 0.000(5) 
O9 0.024(6) 0.022(5) 0.010(5) -0.003(4) 0.009(4) -0.008(5) 
O10 0.011(5) 0.032(6) 0.022(5) -0.016(5) -0.003(4) 0.012(4) 
O11 0.009(4) 0.017(4) 0.004(4) -0.005(3) 0.002(3) 0.002(3) 
O12 0.020(5) 0.021(5) 0.011(5) -0.010(4) -0.006(4) 0.010(4) 
Cl1 0.253(11) 0.082(5) 0.101(6) 0.001(4) -0.077(7) 0.053(6) 
Cl2 0.118(6) 0.096(5) 0.050(4) -0.018(3) 0.000(4) 0.043(4) 
 
_geom_special_details 
; 
 All esds (except the esd in the dihedral angle between two l.s. planes) 
 are estimated using the full covariance matrix.  The cell esds are taken 
 into account individually in the estimation of esds in distances, angles 
 and torsion angles; correlations between esds in cell parameters are only 
 used when they are defined by crystal symmetry.  An approximate (isotropic) 
 treatment of cell esds is used for estimating esds involving l.s. planes. 
; 
 
loop_ 
 _geom_bond_atom_site_label_1 
 _geom_bond_atom_site_label_2 
 _geom_bond_distance 
 _geom_bond_site_symmetry_2 
 _geom_bond_publ_flag 
Mn1 O2 1.943(8) . ? 
Mn1 O2 1.943(8) 2_765 ? 
Mn1 O3 1.969(8) 2_765 ? 
Mn1 O3 1.969(8) . ? 
Mn1 O1 2.098(8) 2_765 ? 
Mn1 O1 2.098(8) . ? 
Mo1 O9 1.707(8) . ? 
Mo1 O5 1.710(9) . ? 
Mo1 O12 1.920(8) . ? 
Mo1 O4 1.942(8) . ? 
Mo1 O1 2.293(8) 2_765 ? 
Mo1 O3 2.428(8) . ? 
Mo2 O6 1.711(9) . ? 
Mo2 O10 1.717(8) . ? 
Mo2 O12 1.915(9) . ? 
Mo2 O11 1.918(8) . ? 
Mo2 O1 2.334(8) 2_765 ? 
Mo2 O2 2.396(8) . ? 
Mo3 O7 1.703(9) . ? 
Mo3 O8 1.723(9) . ? 
Mo3 O4 1.911(8) 2_765 ? 
Mo3 O11 1.938(8) . ? 
Mo3 O3 2.346(8) 2_765 ? 
Mo3 O2 2.349(8) . ? 
S1 C4 1.742(13) . ? 
S1 C1 1.829(14) . ? 
S2 C3 1.754(14) . ? 
S2 C2 1.778(13) . ? 
S3 C5 1.720(14) . ? 
S3 C4 1.756(14) . ? 
S4 C5 1.756(14) . ? 
S4 C3 1.761(13) . ? 
S5 C6 1.757(13) . ? 
S5 C7 1.763(13) . ? 
S6 C8 1.742(13) . ? 
S6 C6 1.747(13) . ? 
S7 C7 1.773(13) . ? 
S7 C10 1.796(12) . ? 
S8 C8 1.751(13) . ? 
S8 C9 1.798(13) . ? 
S9 C11 1.733(15) . ? 
S9 C14 1.783(13) . ? 
S10 C13 1.750(12) . ? 
S10 C12 1.781(16) . ? 
S11 C15 1.734(13) . ? 
S11 C14 1.741(13) . ? 
S12 C15 1.714(13) . ? 
S12 C13 1.736(13) . ? 
S13 C18 1.730(14) . ? 
S13 C16 1.733(12) . ? 
S14 C16 1.749(13) . ? 
S14 C17 1.750(13) . ? 
S15 C18 1.743(14) . ? 
S15 C19 1.805(13) . ? 
S16 C17 1.745(14) . ? 
S16 C20 1.809(13) . ? 
S17 C24 1.742(13) . ? 
S17 C21 1.790(14) . ? 
S18 C23 1.759(13) . ? 
S18 C22 1.803(12) . ? 
S19 C24 1.740(13) . ? 
S19 C25 1.741(12) . ? 
S20 C25 1.742(13) . ? 
S20 C23 1.773(13) . ? 
S21 C26 1.728(13) . ? 
S21 C28 1.759(13) . ? 
S22 C26 1.738(13) . ? 
S22 C27 1.746(13) . ? 
S23 C28 1.730(13) . ? 
S23 C29 1.781(12) . ? 
S24 C27 1.758(14) . ? 
S24 C30 1.819(13) . ? 
C1 C2 1.501(18) . ? 
C3 C4 1.328(17) . ? 
C5 C6 1.371(17) . ? 
C7 C8 1.336(16) . ? 
C9 C10 1.509(16) . ? 
C11 C12 1.375(19) . ? 
C13 C14 1.356(16) . ? 
C15 C16 1.386(17) . ? 
C17 C18 1.371(17) . ? 
C19 C20 1.515(17) . ? 
C21 C22 1.532(16) . ? 
C23 C24 1.336(17) . ? 
C25 C26 1.384(17) . ? 
C27 C28 1.373(18) . ? 
C29 C30 1.495(18) . ? 
C31 O1 1.462(15) . ? 
C31 C34 1.554(16) . ? 
C32 O2 1.469(14) . ? 
C32 C34 1.545(17) . ? 
C33 O3 1.435(14) . ? 
C33 C34 1.539(16) . ? 
C34 N1 1.464(15) . ? 
C35 Cl1 1.76(2) . ? 
C35 Cl2 1.86(2) . ? 
O1 Mo1 2.293(8) 2_765 ? 
O1 Mo2 2.333(8) 2_765 ? 
O3 Mo3 2.346(8) 2_765 ? 
O4 Mo3 1.911(8) 2_765 ? 
 
loop_ 
 _geom_angle_atom_site_label_1 
 _geom_angle_atom_site_label_2 
 _geom_angle_atom_site_label_3 
 _geom_angle 
 _geom_angle_site_symmetry_1 
 _geom_angle_site_symmetry_3 
 _geom_angle_publ_flag 
O2 Mn1 O2 180.0(3) . 2_765 ? 
O2 Mn1 O3 87.1(3) . 2_765 ? 
O2 Mn1 O3 92.9(3) 2_765 2_765 ? 
O2 Mn1 O3 92.9(3) . . ? 
O2 Mn1 O3 87.1(3) 2_765 . ? 
O3 Mn1 O3 180.0(5) 2_765 . ? 
O2 Mn1 O1 87.1(3) . 2_765 ? 
O2 Mn1 O1 92.9(3) 2_765 2_765 ? 
O3 Mn1 O1 92.0(3) 2_765 2_765 ? 
O3 Mn1 O1 88.0(3) . 2_765 ? 
O2 Mn1 O1 92.9(3) . . ? 
O2 Mn1 O1 87.1(3) 2_765 . ? 
O3 Mn1 O1 88.0(3) 2_765 . ? 
O3 Mn1 O1 92.0(3) . . ? 
O1 Mn1 O1 180.0(7) 2_765 . ? 
O9 Mo1 O5 105.7(4) . . ? 
O9 Mo1 O12 97.6(4) . . ? 
O5 Mo1 O12 103.1(4) . . ? 
O9 Mo1 O4 100.1(4) . . ? 
O5 Mo1 O4 100.4(4) . . ? 
O12 Mo1 O4 145.3(3) . . ? 
O9 Mo1 O1 160.0(4) . 2_765 ? 
O5 Mo1 O1 93.5(4) . 2_765 ? 
O12 Mo1 O1 71.8(3) . 2_765 ? 
O4 Mo1 O1 81.7(3) . 2_765 ? 
O9 Mo1 O3 88.2(4) . . ? 
O5 Mo1 O3 164.8(4) . . ? 
O12 Mo1 O3 80.7(3) . . ? 
O4 Mo1 O3 70.4(3) . . ? 
O1 Mo1 O3 73.5(3) 2_765 . ? 
O6 Mo2 O10 105.8(4) . . ? 
O6 Mo2 O12 103.2(4) . . ? 
O10 Mo2 O12 98.4(4) . . ? 
O6 Mo2 O11 99.7(4) . . ? 
O10 Mo2 O11 100.5(4) . . ? 
O12 Mo2 O11 145.0(3) . . ? 
O6 Mo2 O1 93.1(4) . 2_765 ? 
O10 Mo2 O1 160.2(4) . 2_765 ? 
O12 Mo2 O1 70.9(3) . 2_765 ? 
O11 Mo2 O1 81.7(3) . 2_765 ? 
O6 Mo2 O2 163.0(3) . . ? 
O10 Mo2 O2 90.0(3) . . ? 
O12 Mo2 O2 80.4(3) . . ? 
O11 Mo2 O2 70.5(3) . . ? 
O1 Mo2 O2 72.2(3) 2_765 . ? 
O7 Mo3 O8 105.5(4) . . ? 
O7 Mo3 O4 102.4(4) . 2_765 ? 
O8 Mo3 O4 97.6(4) . 2_765 ? 
O7 Mo3 O11 99.0(4) . . ? 
O8 Mo3 O11 101.8(4) . . ? 
O4 Mo3 O11 145.9(3) 2_765 . ? 
O7 Mo3 O3 92.2(4) . 2_765 ? 
O8 Mo3 O3 161.4(4) . 2_765 ? 
O4 Mo3 O3 72.8(3) 2_765 2_765 ? 
O11 Mo3 O3 80.2(3) . 2_765 ? 
O7 Mo3 O2 160.7(4) . . ? 
O8 Mo3 O2 93.0(4) . . ? 
O4 Mo3 O2 80.1(3) 2_765 . ? 
O11 Mo3 O2 71.2(3) . . ? 
O3 Mo3 O2 70.0(3) 2_765 . ? 
C4 S1 C1 103.1(7) . . ? 
C3 S2 C2 97.2(7) . . ? 
C5 S3 C4 95.0(6) . . ? 
C5 S4 C3 94.5(6) . . ? 
C6 S5 C7 94.5(6) . . ? 
C8 S6 C6 95.5(6) . . ? 
C7 S7 C10 101.4(6) . . ? 
C8 S8 C9 100.4(6) . . ? 
C11 S9 C14 99.5(7) . . ? 
C13 S10 C12 101.3(7) . . ? 
C15 S11 C14 94.6(6) . . ? 
C15 S12 C13 95.7(6) . . ? 
C18 S13 C16 96.3(6) . . ? 
C16 S14 C17 96.0(6) . . ? 
C18 S15 C19 99.7(6) . . ? 
C17 S16 C20 102.0(6) . . ? 
C24 S17 C21 102.4(6) . . ? 
C23 S18 C22 97.5(6) . . ? 
C24 S19 C25 96.2(6) . . ? 
C25 S20 C23 95.0(6) . . ? 
C26 S21 C28 95.7(6) . . ? 
C26 S22 C27 94.4(6) . . ? 
C28 S23 C29 100.4(6) . . ? 
C27 S24 C30 100.9(6) . . ? 
C2 C1 S1 113.0(11) . . ? 
C1 C2 S2 115.5(10) . . ? 
C4 C3 S2 127.5(11) . . ? 
C4 C3 S4 116.8(11) . . ? 
S2 C3 S4 115.2(7) . . ? 
C3 C4 S1 129.5(11) . . ? 
C3 C4 S3 117.7(11) . . ? 
S1 C4 S3 112.6(7) . . ? 
C6 C5 S3 124.2(11) . . ? 
C6 C5 S4 120.2(10) . . ? 
S3 C5 S4 115.6(8) . . ? 
C5 C6 S6 123.2(10) . . ? 
C5 C6 S5 122.0(10) . . ? 
S6 C6 S5 114.7(7) . . ? 
C8 C7 S5 117.4(10) . . ? 
C8 C7 S7 129.3(10) . . ? 
S5 C7 S7 113.0(7) . . ? 
C7 C8 S6 117.4(10) . . ? 
C7 C8 S8 127.5(10) . . ? 
S6 C8 S8 115.1(7) . . ? 
C10 C9 S8 113.9(9) . . ? 
C9 C10 S7 115.0(9) . . ? 
C12 C11 S9 122.8(13) . . ? 
C11 C12 S10 119.3(13) . . ? 
C14 C13 S12 116.3(10) . . ? 
C14 C13 S10 127.3(10) . . ? 
S12 C13 S10 116.4(7) . . ? 
C13 C14 S11 117.3(10) . . ? 
C13 C14 S9 128.7(10) . . ? 
S11 C14 S9 113.9(7) . . ? 
C16 C15 S12 123.5(10) . . ? 
C16 C15 S11 120.4(10) . . ? 
S12 C15 S11 116.0(7) . . ? 
C15 C16 S13 122.7(10) . . ? 
C15 C16 S14 122.7(9) . . ? 
S13 C16 S14 114.5(7) . . ? 
C18 C17 S16 128.8(10) . . ? 
C18 C17 S14 115.9(10) . . ? 
S16 C17 S14 115.1(7) . . ? 
C17 C18 S13 117.3(10) . . ? 
C17 C18 S15 127.3(11) . . ? 
S13 C18 S15 115.4(8) . . ? 
C20 C19 S15 112.3(9) . . ? 
C19 C20 S16 113.6(10) . . ? 
C22 C21 S17 113.9(10) . . ? 
C21 C22 S18 113.7(9) . . ? 
C24 C23 S18 129.6(11) . . ? 
C24 C23 S20 117.0(10) . . ? 
S18 C23 S20 113.3(7) . . ? 
C23 C24 S19 117.0(10) . . ? 
C23 C24 S17 128.6(11) . . ? 
S19 C24 S17 114.5(7) . . ? 
C26 C25 S19 122.8(10) . . ? 
C26 C25 S20 122.6(10) . . ? 
S19 C25 S20 114.6(7) . . ? 
C25 C26 S21 122.6(10) . . ? 
C25 C26 S22 121.1(10) . . ? 
S21 C26 S22 116.4(8) . . ? 
C28 C27 S22 118.2(10) . . ? 
C28 C27 S24 128.8(10) . . ? 
S22 C27 S24 112.9(8) . . ? 
C27 C28 S23 127.7(10) . . ? 
C27 C28 S21 115.1(10) . . ? 
S23 C28 S21 117.2(8) . . ? 
C30 C29 S23 114.5(10) . . ? 
C29 C30 S24 113.8(10) . . ? 
O1 C31 C34 114.5(10) . . ? 
O2 C32 C34 116.2(10) . . ? 
O3 C33 C34 115.3(10) . . ? 
N1 C34 C33 109.1(10) . . ? 
N1 C34 C32 105.8(9) . . ? 
C33 C34 C32 109.9(10) . . ? 
N1 C34 C31 107.6(10) . . ? 
C33 C34 C31 113.1(10) . . ? 
C32 C34 C31 111.1(10) . . ? 
Cl1 C35 Cl2 103.0(14) . . ? 
C31 O1 Mn1 114.2(7) . . ? 
C31 O1 Mo1 123.2(7) . 2_765 ? 
Mn1 O1 Mo1 99.5(3) . 2_765 ? 
C31 O1 Mo2 123.5(7) . 2_765 ? 
Mn1 O1 Mo2 99.1(3) . 2_765 ? 
Mo1 O1 Mo2 92.1(3) 2_765 2_765 ? 
C32 O2 Mn1 115.5(7) . . ? 
C32 O2 Mo3 120.6(7) . . ? 
Mn1 O2 Mo3 101.8(3) . . ? 
C32 O2 Mo2 122.1(7) . . ? 
Mn1 O2 Mo2 101.7(3) . . ? 
Mo3 O2 Mo2 90.7(3) . . ? 
C33 O3 Mn1 117.0(7) . . ? 
C33 O3 Mo3 122.2(7) . 2_765 ? 
Mn1 O3 Mo3 101.1(3) . 2_765 ? 
C33 O3 Mo1 122.3(7) . . ? 
Mn1 O3 Mo1 98.9(3) . . ? 
Mo3 O3 Mo1 89.7(3) 2_765 . ? 
Mo3 O4 Mo1 121.8(4) 2_765 . ? 
Mo2 O11 Mo3 122.1(4) . . ? 
Mo2 O12 Mo1 120.5(4) . . ? 
 
_diffrn_measured_fraction_theta_max    0.948 
_diffrn_reflns_theta_full              27.48 
_diffrn_measured_fraction_theta_full   0.948 
_refine_diff_density_max    1.344 
_refine_diff_density_min   -1.013 
_refine_diff_density_rms    0.218 
